# Supplementary material for: Developmental psychopathology: Attention Deficit Hyperactivity Disorder (ADHD)
Source: Springer Nature journal article supplement (doi:10.1186/1471-244x-9-58), 2009-09-17

- Legend**
- Risk factors
  - Predisposing factors
  - Changes in adulthood
  - Only adulthood
  - Not certain
  - Developmental dimension

**Symptoms of ADHD (childhood)**

- inattentiveness
- hyperactivity
- impulsivity

**Comorbid disorders/  
impact on daily life**

**Conduct disorder and oppositional defiant disorder**  
deficits in social competence, rejections of caregivers and peers

**School anxiety**  
**Scholar performance**  
*Conflicts with homework avoidance, school reluctance*

**Substance abuse/ Delinquency**  
*influence of peer group traffic offenses Resignation to learn*

**Affective disorders**

**Symptoms of ADHD (adulthood)**

- inattentiveness
- motor restlessness
- impulsivity
- desorganisation
- affect instability
- extreme emotional reactions

**Borderline personality disorder**  
**Antisocial personality disorder**  
*Problems at work and at home (Organisation) partnership problems affect fluctuations)*

**Birth**

**Life span**

- Predisposing factors**
- pregnancy
  - smoking
  - Social background
  - alcohol
  - stress
  - genetics

**Kindergarden /preschool**

**Entrance to school**

**Transition to adulthood**

**Polymorphism of catecholaminergic genes**

**Dysfunction frontal-striatal networks**  
→ neurotransmitter deregulation

**Inhibitory deficit**

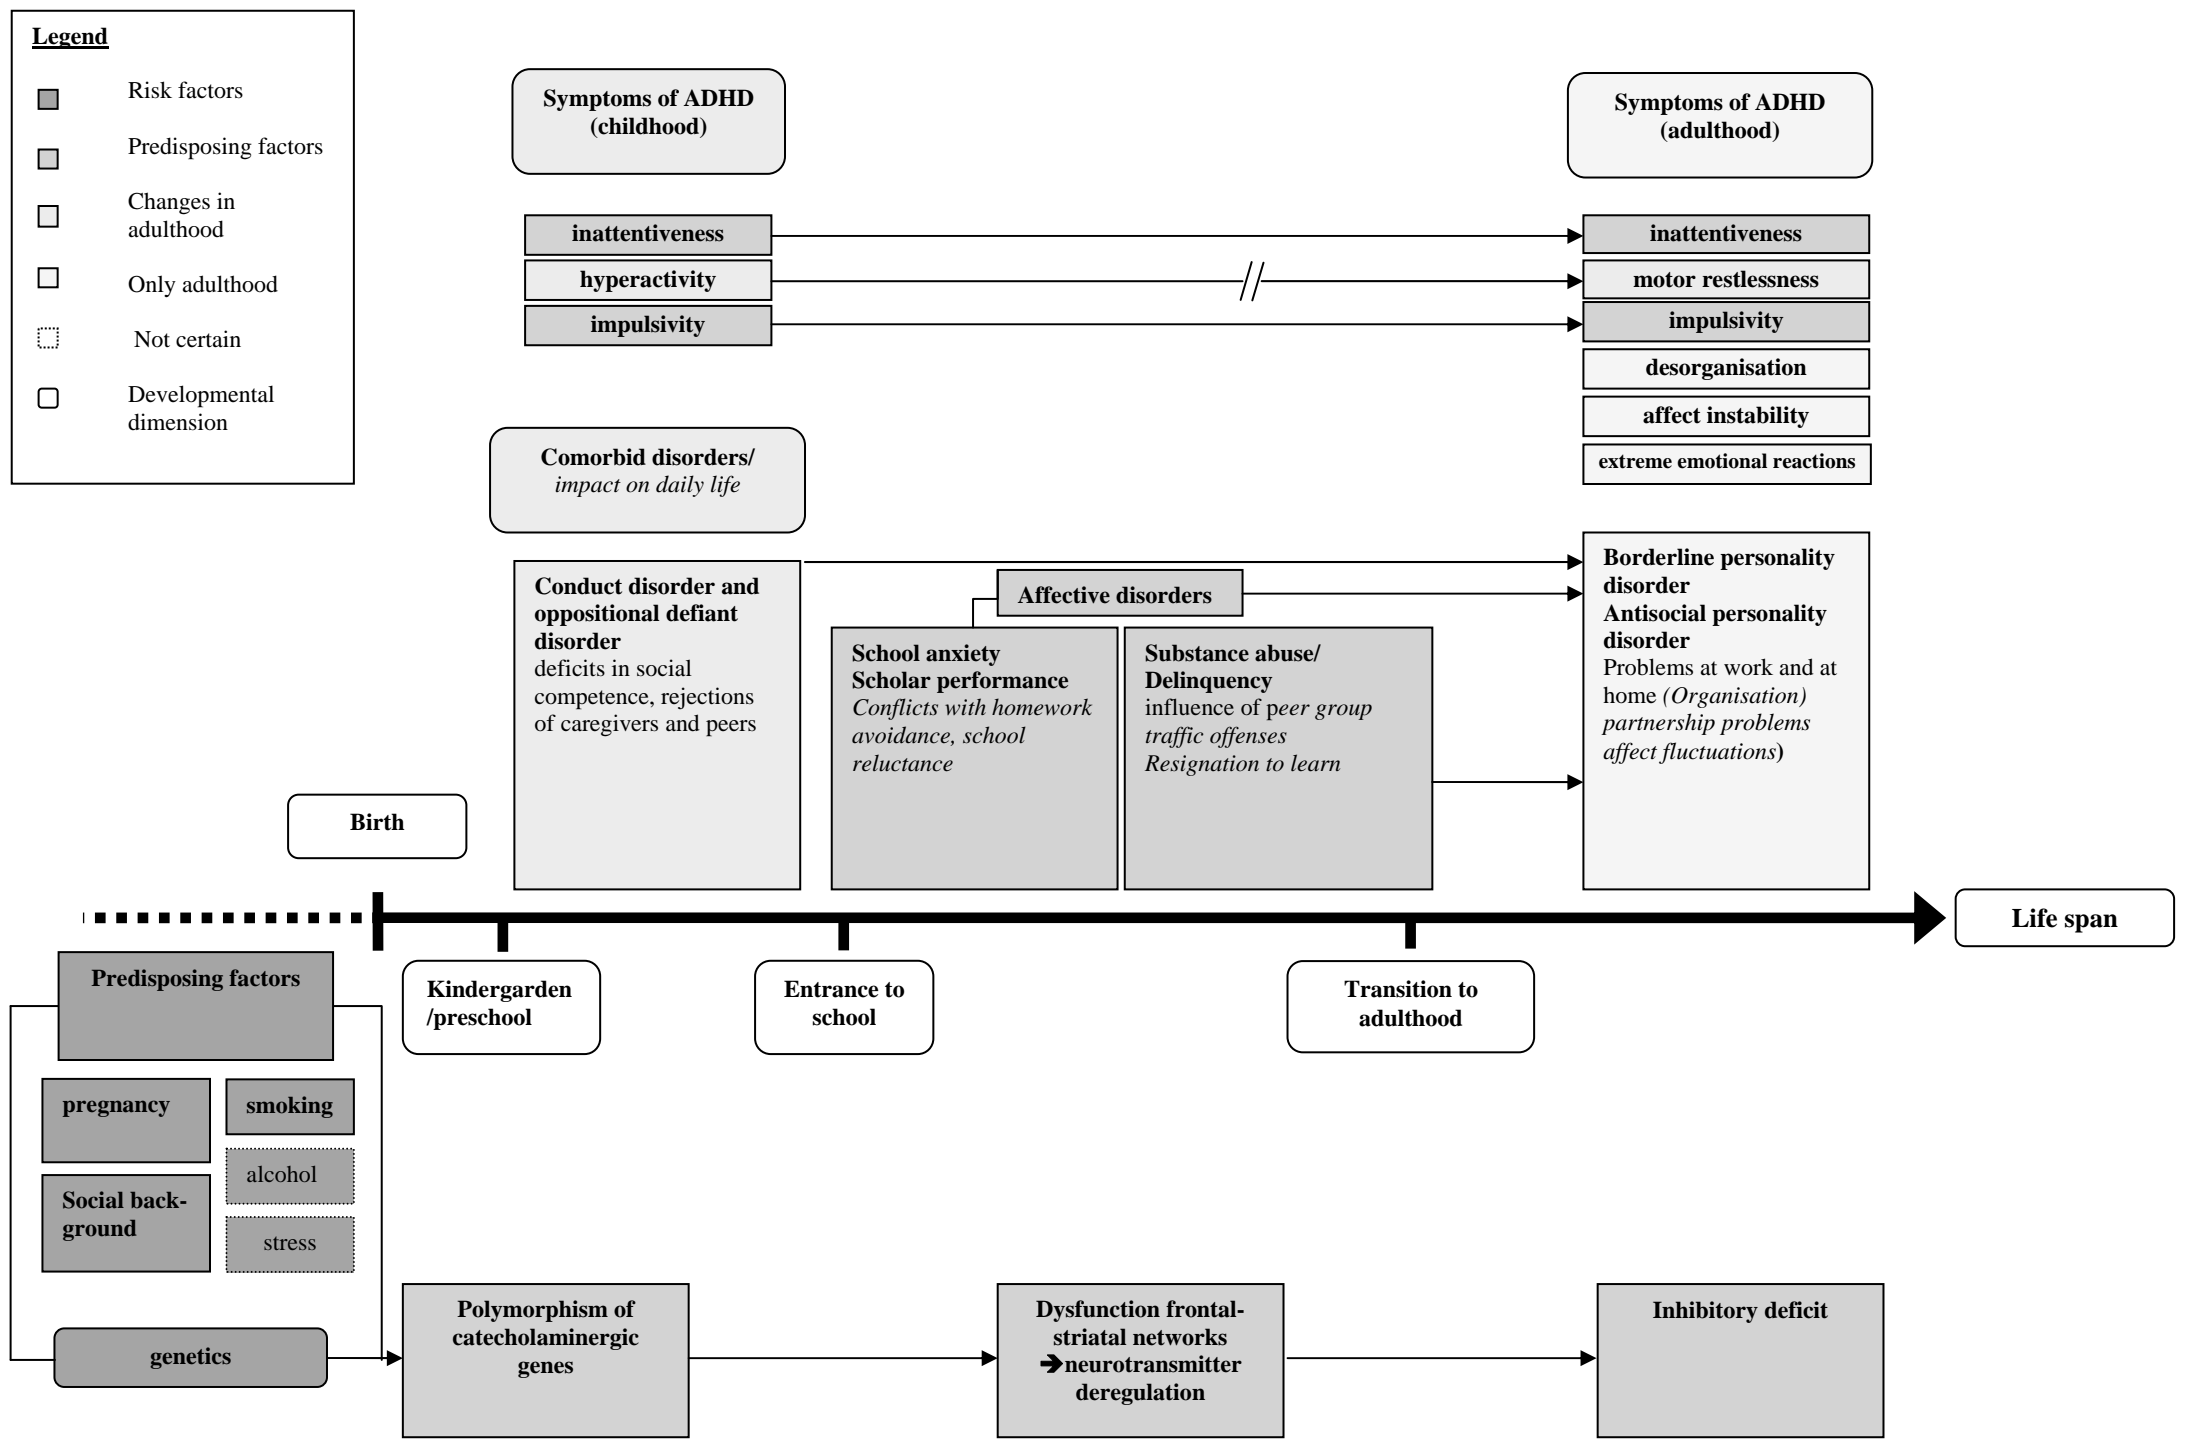

Supplement: 12888_2009_606_MOESM1_ESM.pdf [file 12888_2009_606_MOESM1_ESM.pdf]
